# Supplementary material for: Metagenomic analysis of microbial consortia enriched from compost: new insights into the role of Actinobacteria in lignocellulose decomposition
Source: PubMed Central journal article supplement (PMC4731972; doi:10.1186/s13068-016-0440-2), 2016-01-29

**Post-enrichment**

**Pre-enrichment**

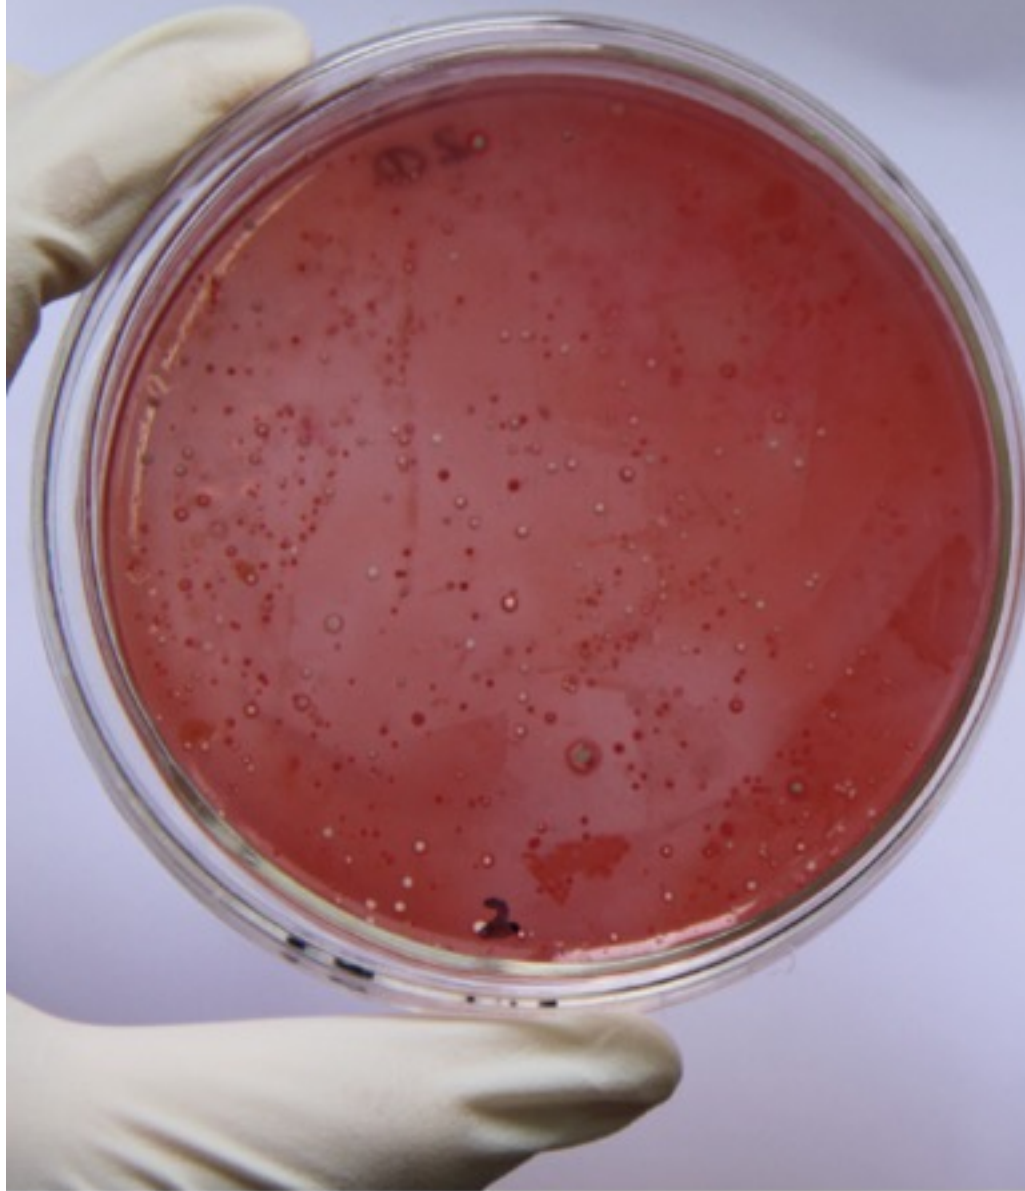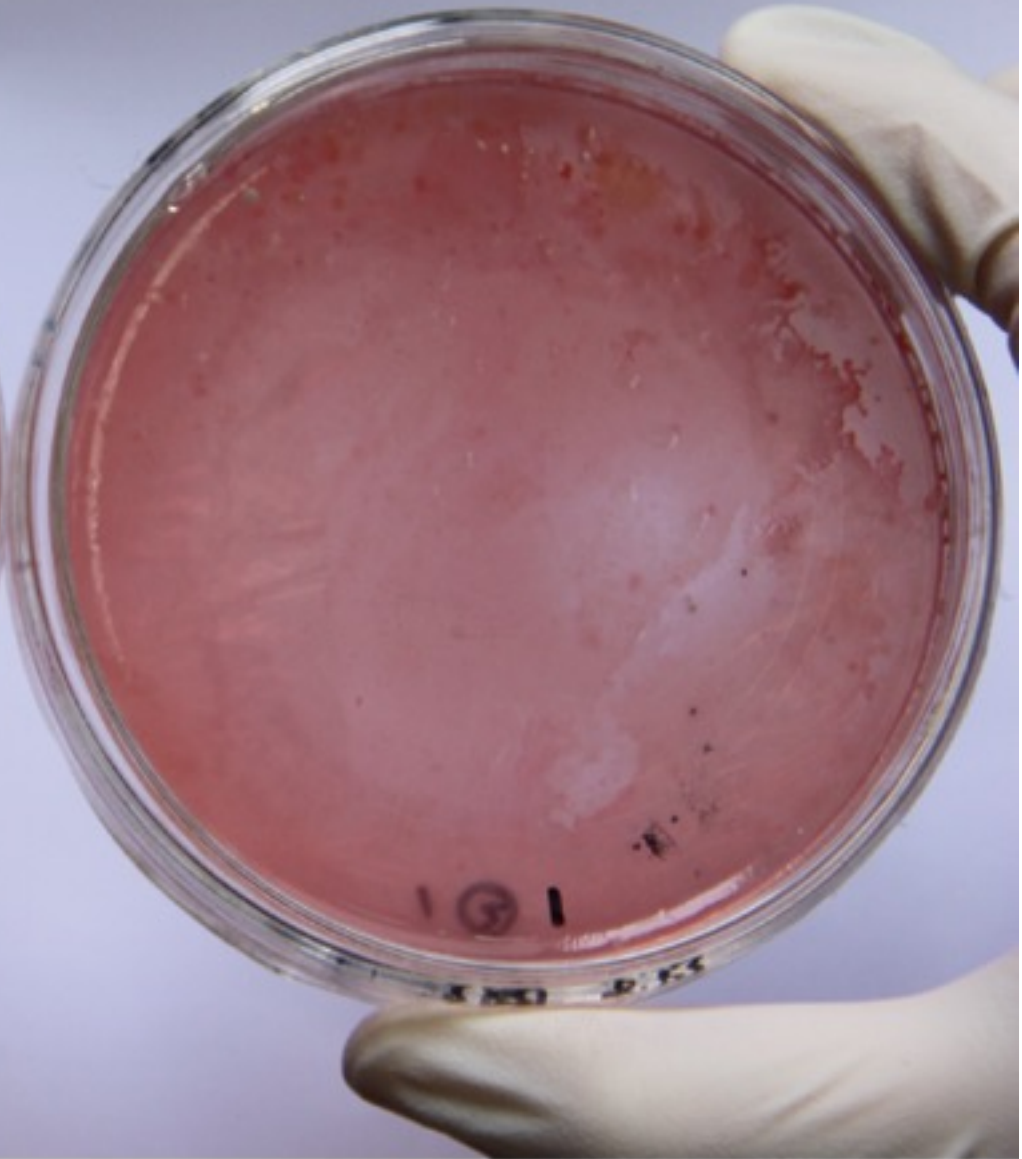

Supplement: 13068_2016_440_MOESM2_ESM.pdf [file 13068_2016_440_MOESM2_ESM.pdf]
